# Supplementary material
Source: PubMed Central journal article supplement (PMC2822115)
Supplement: NIHMS146121-supplement-1.pdf [file NIHMS146121-supplement-1.pdf]

## Supplementary Figure Legends

**Supplementary Figure 1.** VEGFR1 and VEGFR2 expression in a xenografted head and neck squamous cell carcinoma (HNSCC). Serial and sequential tissue sections prepared from xenografted tumors originated by the co-implantation of UM-SCC-1 and HDMEC were immunostained with anti-human VEGFR1, VEGFR2, VEGF, and isotype-matched IgG. Representative fields at 40x and 100x.

**Supplementary Figure 2.** Effect of the activation of the JNK-c-Jun signaling axis on VEGFR2 expression in endothelial cells. **(a)** HDMEC were exposed to UV radiation for 1 min, and then cultured for indicated time points. **(b)** Starved HDMEC were pre-incubated with 10  $\mu$ M SP600125 for 1 hour, then treated with 2.5  $\mu$ g/ml Anisomycin in presence/absence of SP600125. VEGFR2 expression and JNK/c-Jun activation were detected by Western blots.

**Supplementary Figure 3.** Effect of STAT3, Akt, and ERK1/2 signaling on endothelial cell survival and capillary tube formation. **(a-c)** Graph depicting the number of capillary branches **(a)**, representative photomicrographs (40x) **(c)**, and graph depicting the number of HDMEC **(b)** cultured in presence of 5  $\mu$ M or 20  $\mu$ M JAK II inhibitor AG490, PI3-K inhibitor LY294002, or MEK inhibitor (upstream of ERK) PD98059 **(c)**. HDMEC were cultured in growth factor reduced Matrigel with complete EGM2-MV medium for 24 hours. Data are represented as mean  $\pm$  SD from three independent experiments. Asterisk indicates  $p < 0.05$ , as compared to vehicle controls.

**Supplementary Figure 4.** Effect of VEGF on FBS-mediated regulation of VEGFR1 and VEGFR2. HDMEC were cultured in absence or presence of 5% fetal bovine serum (FBS), and treated with 0-100  $\mu$ g/ml Bevacizumab for 24 hours. VEGFR1 and VEGFR2 expression were detected by Western blot.

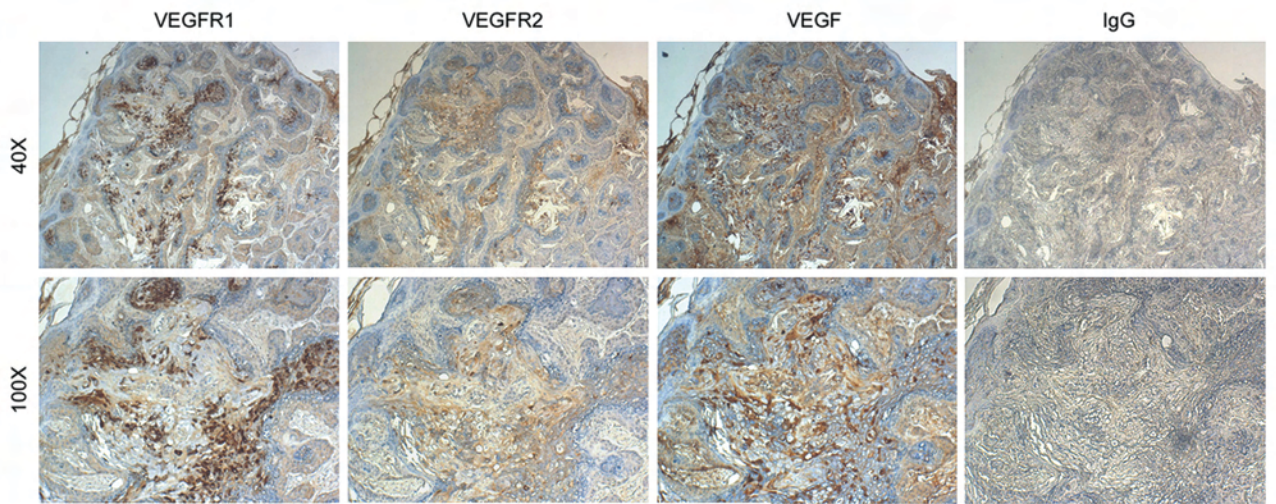

Figure S1 - Zhang et al

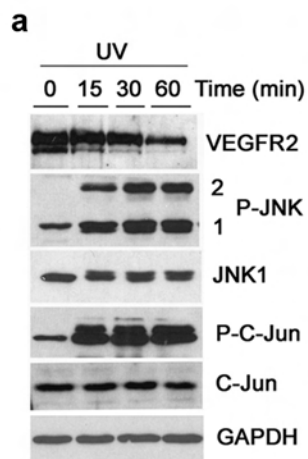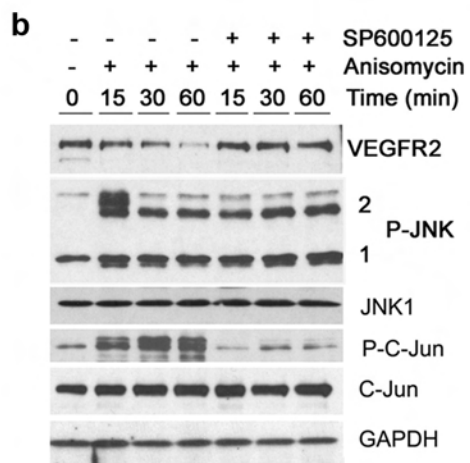

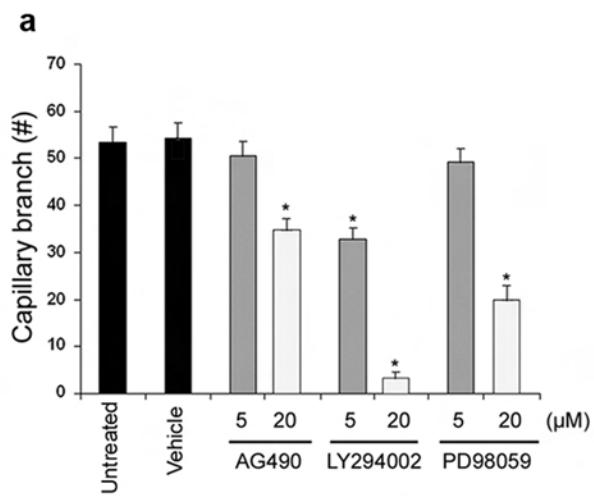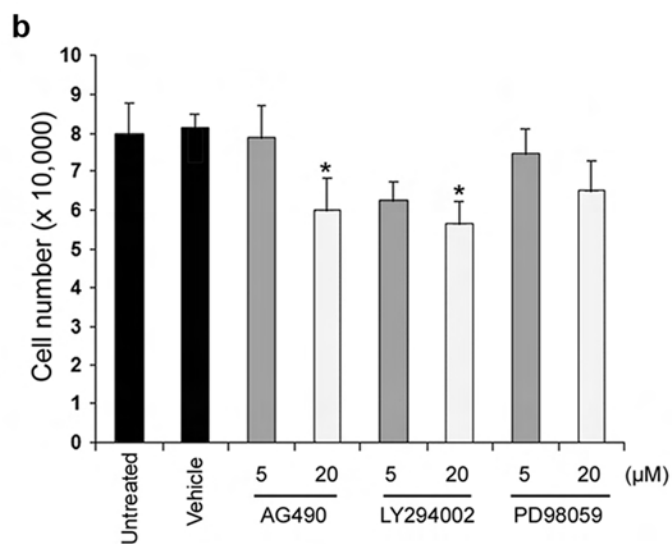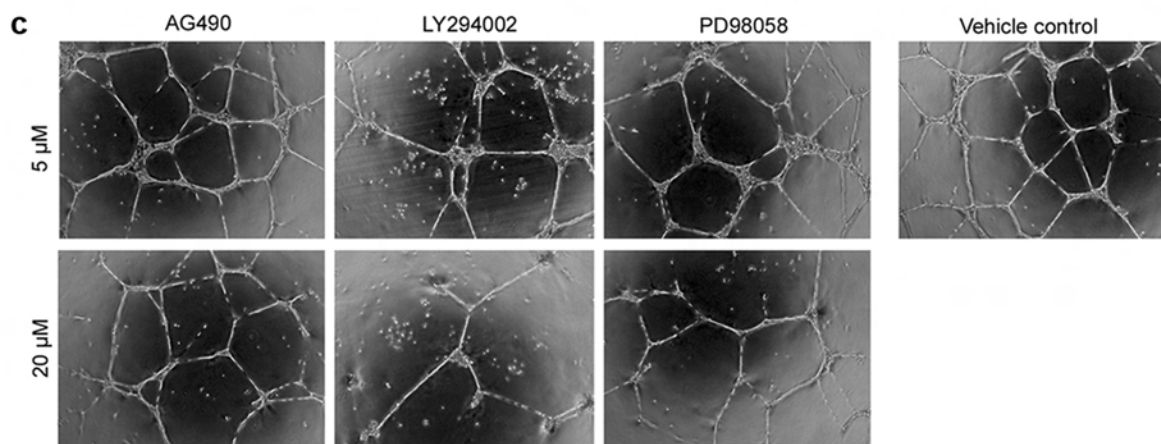

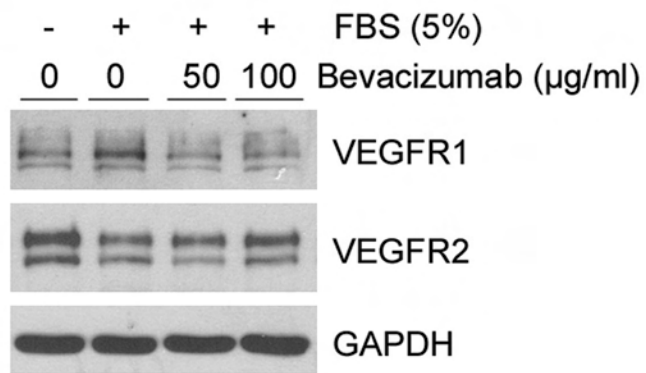

Figure S4 - Zhang et al
